# Supplementary material for: Crystal Structures of Pyrophosphatase from Acinetobacter baumannii: Snapshots of Pyrophosphate Binding and Identification of a Phosphorylated Enzyme Intermediate
Source: PubMed Central journal article supplement (PMC6770254; doi:10.3390/ijms20184394), 2019-09-06
Supplement: ijms-20-04394-s001.pdf [file ijms-20-04394-s001.pdf]

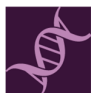

Article

## Crystal Structures of Pyrophosphatase from *Acinetobacter baumannii*: Snapshots of Pyrophosphate Binding and Identification of a Phosphorylated Enzyme Intermediate

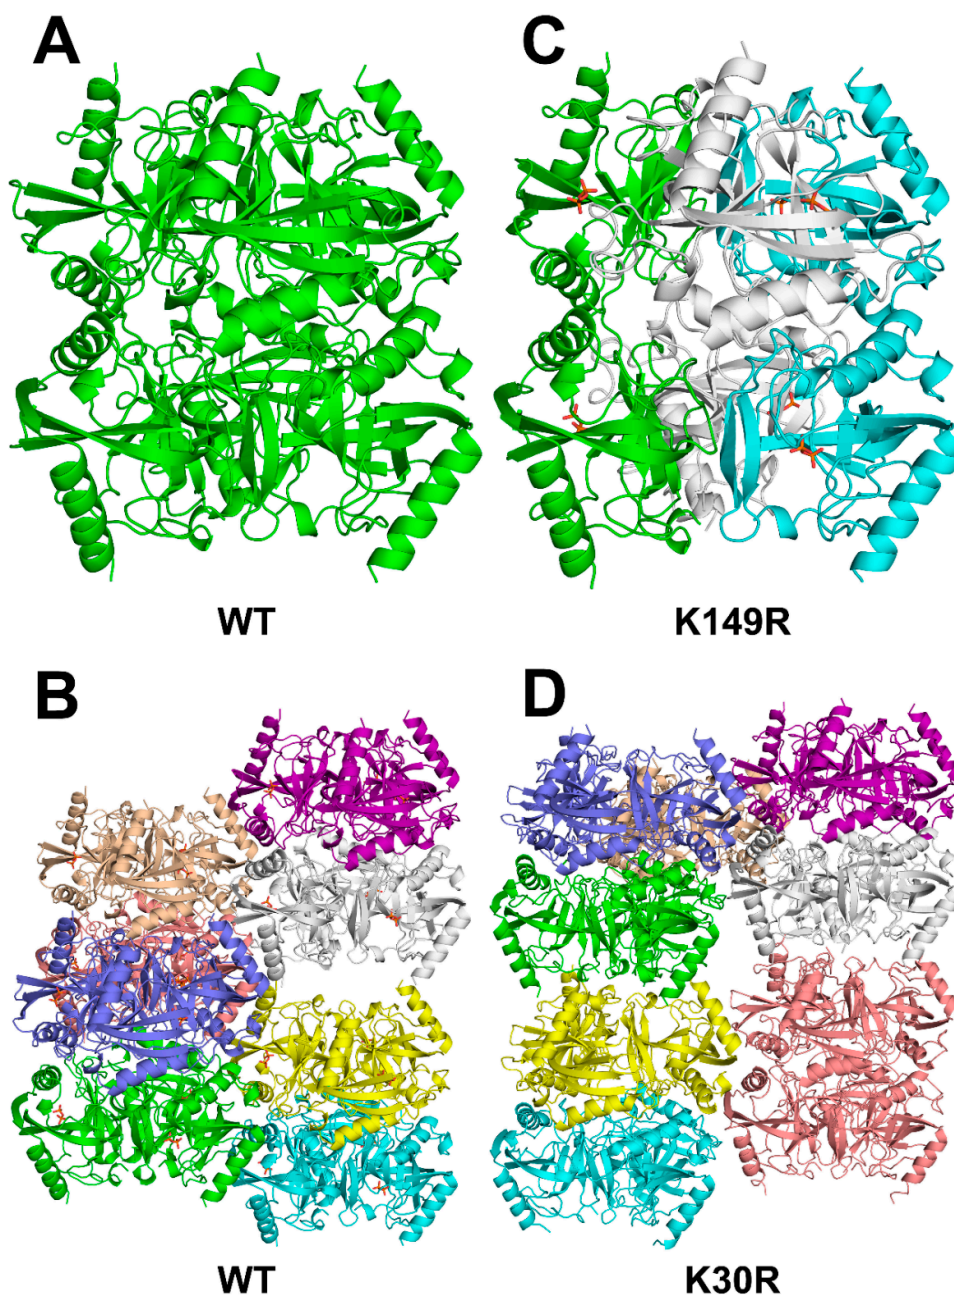

**Figure S1.** Side view of crystal packings of AbPPase. (A) Crystal structure 1 of AbPPase without PPi in which there is only one monomer in the asymmetric unit. And only one type of AbPPase hexamers was assembled (B) Crystal structure 2 of AbPPase with PPi in which there are eight

AbPPase monomers in the asymmetric unit. Eight different trimers could assemble four different types of AbPPase hexamers. (C) Crystal structure 3 (K149R) of AbPPase with PPi in which three AbPPase monomers form a trimer in the asymmetric unit. And one type of AbPPase hexamers was assembled. (D) Crystal structure 4 (K30R) of AbPPase without PPi in which there are eight AbPPase monomers in the asymmetric unit. And could assemble four different types of AbPPase hexamers and one type of trimers.

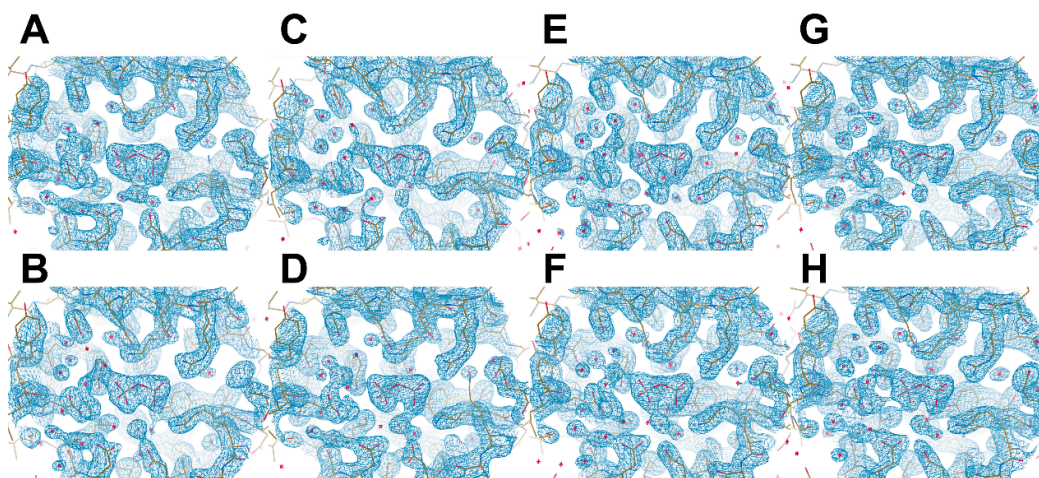

**Figure S2.** Comparison of the electron density for the ligand PPi molecule in each monomer subunit. (A) PPi molecule in monomer A subunit. (B) PPi molecule in monomer B subunit. (C) PPi molecule in monomer C subunit. (D) PPi molecule in monomer D subunit. (E) PPi molecule in monomer E subunit. (F) PPi molecule in monomer F subunit. (G) PPi molecule in monomer G subunit. (H) PPi molecule in monomer H subunit. The electron density for the PPi molecules showed them to be different in each monomer subunit.
